# Supplementary material
Source: PubMed Central journal article supplement (PMC2824381)
Supplement: 0908801107_pnas.200908801SI.pdf [file 0908801107_pnas.200908801SI.pdf]

# Supporting Information

Stagg et al. 10.1073/pnas.0908801107

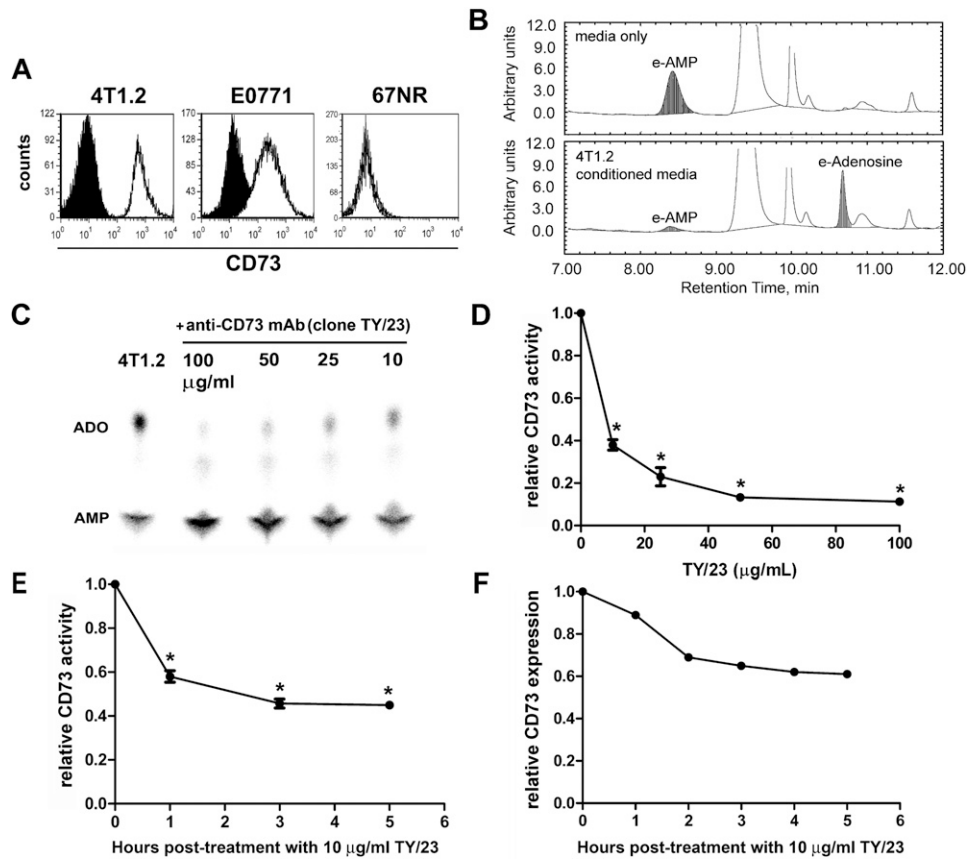

**Fig. S1.** (A) 4T1.2, E0771, and 67NR mouse breast-cancer cell lines were analyzed for CD73 expression by flow cytometry (black, unstained control; white, CD73). (B) HPLC analysis of extracellular adenosine production by 4T1.2 tumor cells in vitro. (C) TLC of conditioned media from 4T1.2 tumor cells treated with increasing doses of anti-CD73 mAb (TY/23) for 5 h. (D) Relative CD73 activity of 4T1.2 cells treated TY/23 for 5 h (\*,  $P < 0.05$  by Mann-Whitney test; means  $\pm$  SEs of triplicates are shown). (E) Relative CD73 activity of 4T1.2 cells treated with 10  $\mu\text{g/ml}$  TY/23 for the indicated time (\*,  $P < 0.05$  by Mann-Whitney test; means  $\pm$  SEs of triplicates are shown). (F) Relative CD73 cell-surface expression as determined by flow cytometry on 4T1.2 tumor cells treated with 10  $\mu\text{g/ml}$  TY/23 for the indicated time (one representative of two experiments is shown).
